# Supplementary material for: Biocatalytic reductive aminations with NAD(P)H-dependent enzymes: enzyme discovery, engineering and synthetic applications
Source: Royal Society of Chemistry journal article supplement (doi:10.1039/d3cs00391d), 2023-12-07
Supplement: d3cs00391d1.pdf [file d3cs00391d1.pdf]

## Supporting Information

### **Biocatalytic Reductive Aminations with NAD(P)H-Dependent Enzymes: Enzyme Discovery, Engineering and Synthetic Applications**

Bo Yuan<sup>a,b,\*</sup>, Dameng Yang<sup>a</sup>, Ge Qu<sup>a,b</sup>, Nicholas J. Turner<sup>c,\*</sup>, Zhoutong Sun<sup>a,b,\*</sup>

<sup>a</sup> Tianjin Institute of Industrial Biotechnology, Chinese Academy of Sciences, Tianjin 300308, China

<sup>b</sup> Key Laboratory of Engineering Biology for Low-Carbon Manufacturing, Tianjin Institute of Industrial Biotechnology, Chinese Academy of Sciences, 32 West 7th Avenue, Tianjin Airport Economic Area, Tianjin 300308, China

<sup>c</sup> Department of Chemistry, Manchester Institute of Biotechnology, University of Manchester, Manchester M1 7DN, U.K

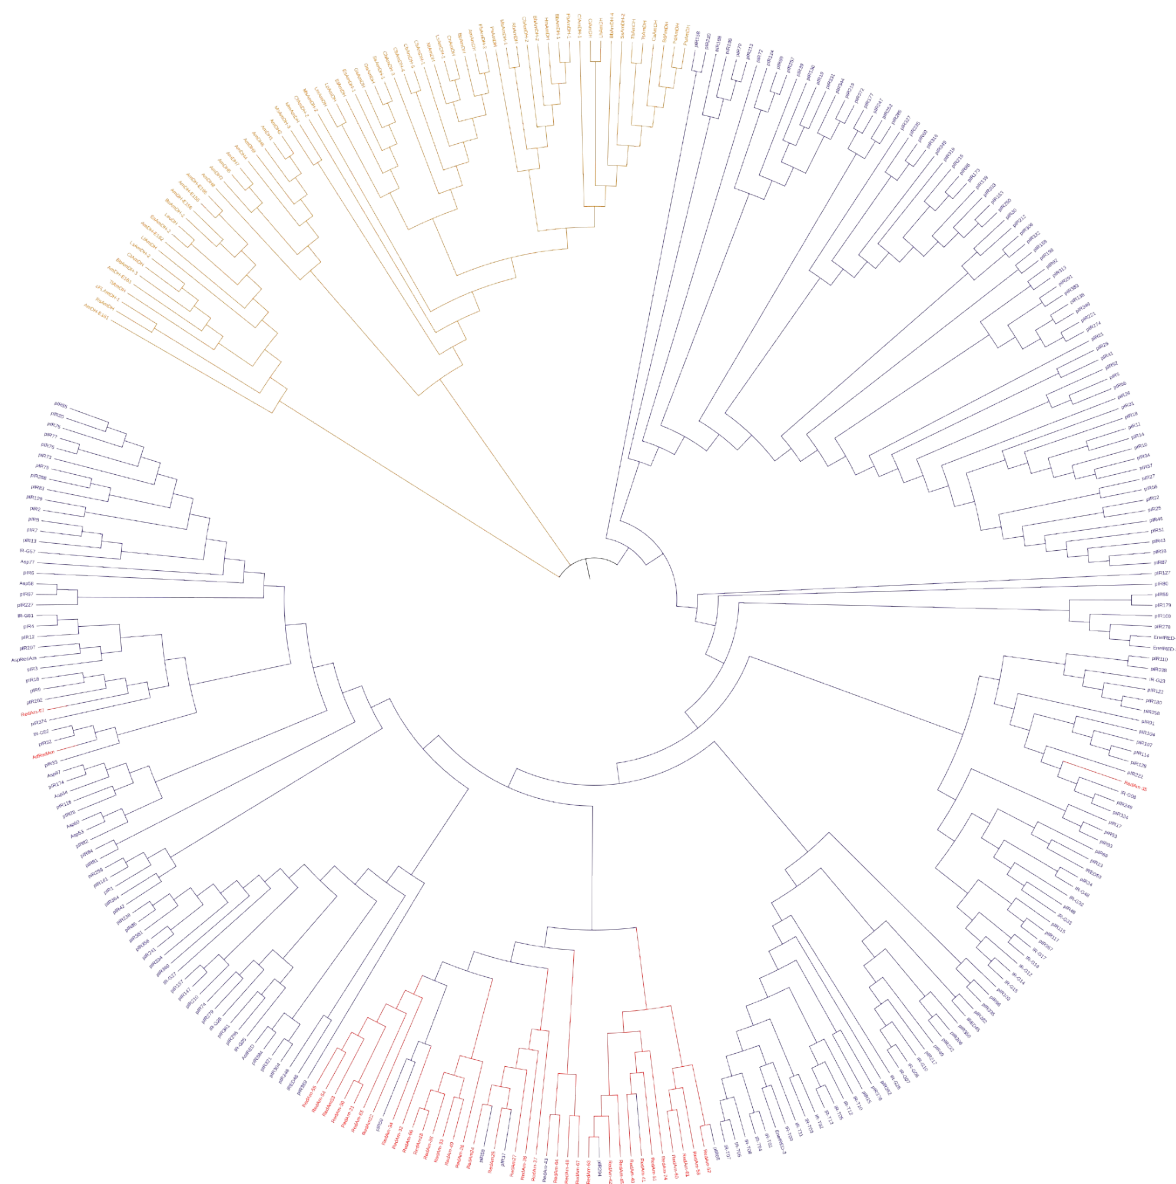

Fig. S1. The phylogenetic tree of AmdHs, IREs and RedAms. Brown branches represent AmdHs, purple branches represent IREs, and red branches represent RedAms.
